# Supplementary material for: Impacts of incorporating personal genome sequencing into graduate genomics education: a longitudinal study over three course years
Source: PubMed Central journal article supplement (PMC5791365; doi:10.1186/s12920-018-0319-0), 2018-01-30
Supplement: 12920_2018_319_MOESM2_ESM.pdf [file 12920_2018_319_MOESM2_ESM.pdf]

## PAPG Summer "Before" Questionnaire

The purpose of this study, entitled "Students' attitudes towards the use of personal genome data in the classroom", is to learn about students' attitudes towards having the option of analyzing their own genomes as part of the class process when learning about whole genome sequencing. Our goal in this research study is to learn more about how students feel about analyzing their own genome data in the classroom.

Your participation in this research study is voluntary. You may choose not to participate. If you choose to participate, you may stop taking part in this research study at any time without any penalty. This will not affect your participation, grade or any other aspect of your involvement in the personal genome analysis courses, or any other aspect of your education at Mount Sinai School of Medicine.

The procedure involves filling out an online survey that will take approximately 30 minutes. Your survey data will be identified only by a study number; your name and other information that could identify you will not be on the questionnaires. The study number will be "linked" to your name in a secure database which will not be accessible by any of the course instructors. This is to ensure that the instructors will not know if you are participating in the study, or what your answers to the questionnaires are.

If you have any questions, concerns, or complaints at any time about this research, or you think the research has hurt you, please contact Dr. Sanderson at telephone number 212-659-8520. This research has been reviewed and approved by Mount Sinai's Institutional Review Board. You may reach a representative of the Program for Protection of Human Subjects at Mount Sinai School of Medicine at telephone number (212) 824-8200 during standard work hours

1. Please select your choice below:

- I wish to continue with the questionnaire
- I DO NOT wish to continue and want to exit

## PAPG Summer "Before" Questionnaire

### Decision and decisional conflict

**We are interested in knowing what your feelings are about analyzing your own versus an anonymous donated genome as part of an advanced whole genome sequencing course in the future. We are interested in knowing what your feelings are about this at the present time.**

2. Would you want to analyze your own genome as part of an advanced whole genome sequencing course?

- No definitely not
- No probably not
- Yes probably
- Yes definitely
- Don't know
- It depends

3. At this point, which of the following options would you prefer? Please check one.

- Option 1:** I would like to analyze my own genome as part of an advanced whole genome sequencing course.
- Option 2:** I would not like to analyze my own genome as part of an advanced whole genome sequencing course, and would rather analyze an anonymous donated genome.

4. Considering the option you prefer, please respond to the following statements:

|                                                                             | Strongly disagree     | Disagree              | Neither agree nor disagree | Agree                 | Strongly Agree        |
|-----------------------------------------------------------------------------|-----------------------|-----------------------|----------------------------|-----------------------|-----------------------|
| I know which options are available to me.                                   | <input type="radio"/> | <input type="radio"/> | <input type="radio"/>      | <input type="radio"/> | <input type="radio"/> |
| I know the benefits of each option.                                         | <input type="radio"/> | <input type="radio"/> | <input type="radio"/>      | <input type="radio"/> | <input type="radio"/> |
| I know the risks of each option.                                            | <input type="radio"/> | <input type="radio"/> | <input type="radio"/>      | <input type="radio"/> | <input type="radio"/> |
| I am clear about which benefits matter most to me.                          | <input type="radio"/> | <input type="radio"/> | <input type="radio"/>      | <input type="radio"/> | <input type="radio"/> |
| I am clear about which risks matter most.                                   | <input type="radio"/> | <input type="radio"/> | <input type="radio"/>      | <input type="radio"/> | <input type="radio"/> |
| I am clear about which is more important to me (the benefits or the risks). | <input type="radio"/> | <input type="radio"/> | <input type="radio"/>      | <input type="radio"/> | <input type="radio"/> |
| I have enough support from others to make a choice.                         | <input type="radio"/> | <input type="radio"/> | <input type="radio"/>      | <input type="radio"/> | <input type="radio"/> |
| I am choosing without pressure from others.                                 | <input type="radio"/> | <input type="radio"/> | <input type="radio"/>      | <input type="radio"/> | <input type="radio"/> |
| I have enough advice to make a choice.                                      | <input type="radio"/> | <input type="radio"/> | <input type="radio"/>      | <input type="radio"/> | <input type="radio"/> |
| I am clear about the best choice for me.                                    | <input type="radio"/> | <input type="radio"/> | <input type="radio"/>      | <input type="radio"/> | <input type="radio"/> |
| I feel sure about what to choose.                                           | <input type="radio"/> | <input type="radio"/> | <input type="radio"/>      | <input type="radio"/> | <input type="radio"/> |
| This decision is easy for me to make.                                       | <input type="radio"/> | <input type="radio"/> | <input type="radio"/>      | <input type="radio"/> | <input type="radio"/> |
| I feel I have made an informed choice.                                      | <input type="radio"/> | <input type="radio"/> | <input type="radio"/>      | <input type="radio"/> | <input type="radio"/> |
| My decision shows what is important to me.                                  | <input type="radio"/> | <input type="radio"/> | <input type="radio"/>      | <input type="radio"/> | <input type="radio"/> |
| I expect to stick with my decision.                                         | <input type="radio"/> | <input type="radio"/> | <input type="radio"/>      | <input type="radio"/> | <input type="radio"/> |
| I am satisfied with my decision.                                            | <input type="radio"/> | <input type="radio"/> | <input type="radio"/>      | <input type="radio"/> | <input type="radio"/> |

5. I think analyzing my own genome as part of an advanced whole genome sequencing course would be useful.

- Strongly disagree
- Disagree
- Neither agree nor disagree
- Agree
- Strongly agree

## PAPG Summer "Before" Questionnaire

### Reasons for and against using own genome

#### 6. Reasons for using own genome:

|                                                              | Strongly disagree     | Disagree              | Neither agree nor disagree | Agree                 | Strongly agree        | Not applicable        |
|--------------------------------------------------------------|-----------------------|-----------------------|----------------------------|-----------------------|-----------------------|-----------------------|
| Satisfy general curiosity                                    | <input type="radio"/> | <input type="radio"/> | <input type="radio"/>      | <input type="radio"/> | <input type="radio"/> | <input type="radio"/> |
| See if a specific disease runs in the family or is in DNA    | <input type="radio"/> | <input type="radio"/> | <input type="radio"/>      | <input type="radio"/> | <input type="radio"/> | <input type="radio"/> |
| Learn about genetic makeup without going through a physician | <input type="radio"/> | <input type="radio"/> | <input type="radio"/>      | <input type="radio"/> | <input type="radio"/> | <input type="radio"/> |
| Inform family members about health risks                     | <input type="radio"/> | <input type="radio"/> | <input type="radio"/>      | <input type="radio"/> | <input type="radio"/> | <input type="radio"/> |
| Understand what a patient may learn/experience               | <input type="radio"/> | <input type="radio"/> | <input type="radio"/>      | <input type="radio"/> | <input type="radio"/> | <input type="radio"/> |
| Help understand principles of human genetics                 | <input type="radio"/> | <input type="radio"/> | <input type="radio"/>      | <input type="radio"/> | <input type="radio"/> | <input type="radio"/> |

#### 7. Reasons against using own genome:

|                                                                            | Strongly disagree     | Disagree              | Neither agree nor disagree | Agree                 | Strongly agree        | Not applicable        |
|----------------------------------------------------------------------------|-----------------------|-----------------------|----------------------------|-----------------------|-----------------------|-----------------------|
| Results are not reliable                                                   | <input type="radio"/> | <input type="radio"/> | <input type="radio"/>      | <input type="radio"/> | <input type="radio"/> | <input type="radio"/> |
| Results are not accurate                                                   | <input type="radio"/> | <input type="radio"/> | <input type="radio"/>      | <input type="radio"/> | <input type="radio"/> | <input type="radio"/> |
| Results are not predictive                                                 | <input type="radio"/> | <input type="radio"/> | <input type="radio"/>      | <input type="radio"/> | <input type="radio"/> | <input type="radio"/> |
| Concern about privacy/risks to privacy                                     | <input type="radio"/> | <input type="radio"/> | <input type="radio"/>      | <input type="radio"/> | <input type="radio"/> | <input type="radio"/> |
| Information will not be medically useful/will not change medical decisions | <input type="radio"/> | <input type="radio"/> | <input type="radio"/>      | <input type="radio"/> | <input type="radio"/> | <input type="radio"/> |
| Information will not help learn human genetics                             | <input type="radio"/> | <input type="radio"/> | <input type="radio"/>      | <input type="radio"/> | <input type="radio"/> | <input type="radio"/> |
| Unwanted information                                                       | <input type="radio"/> | <input type="radio"/> | <input type="radio"/>      | <input type="radio"/> | <input type="radio"/> | <input type="radio"/> |
| Costs too much                                                             | <input type="radio"/> | <input type="radio"/> | <input type="radio"/>      | <input type="radio"/> | <input type="radio"/> | <input type="radio"/> |

## PAPG Summer "Before" Questionnaire

### Perceived benefits and concerns

8. If personal genome sequencing was offered for free as an optional part of an advanced whole genome sequencing class so that I could analyze my results anonymously in relationship to what I was learning with principles discussed generally in class...

|                                                                                                                  | Strongly disagree     | Disagree              | Neither agree nor disagree | Agree                 | Strongly agree        | Not applicable        |
|------------------------------------------------------------------------------------------------------------------|-----------------------|-----------------------|----------------------------|-----------------------|-----------------------|-----------------------|
| My own results would help me understand genetics concepts better than someone else's results.                    | <input type="radio"/> | <input type="radio"/> | <input type="radio"/>      | <input type="radio"/> | <input type="radio"/> | <input type="radio"/> |
| I feel that I would be at a disadvantage to my classmates if I did not undergo the testing.                      | <input type="radio"/> | <input type="radio"/> | <input type="radio"/>      | <input type="radio"/> | <input type="radio"/> | <input type="radio"/> |
| I would see this as an opportunity to get a service that I would not ordinarily get if I had to pay full price.  | <input type="radio"/> | <input type="radio"/> | <input type="radio"/>      | <input type="radio"/> | <input type="radio"/> | <input type="radio"/> |
| I would be concerned that my professors would know who took up the offer of testing and who did not.             | <input type="radio"/> | <input type="radio"/> | <input type="radio"/>      | <input type="radio"/> | <input type="radio"/> | <input type="radio"/> |
| I would be concerned that my classmates would know who took up the offer of testing and who did not.             | <input type="radio"/> | <input type="radio"/> | <input type="radio"/>      | <input type="radio"/> | <input type="radio"/> | <input type="radio"/> |
| I would see this as an opportunity to get information that would help me improve my health.                      | <input type="radio"/> | <input type="radio"/> | <input type="radio"/>      | <input type="radio"/> | <input type="radio"/> | <input type="radio"/> |
| I would be concerned that I might get some results that would be disturbing.                                     | <input type="radio"/> | <input type="radio"/> | <input type="radio"/>      | <input type="radio"/> | <input type="radio"/> | <input type="radio"/> |
| I would only take up the offer of testing if I could get genetic counseling before I sent my sample in.          | <input type="radio"/> | <input type="radio"/> | <input type="radio"/>      | <input type="radio"/> | <input type="radio"/> | <input type="radio"/> |
| I would only take up the offer of testing if I could get genetic counseling after I got my results back in.      | <input type="radio"/> | <input type="radio"/> | <input type="radio"/>      | <input type="radio"/> | <input type="radio"/> | <input type="radio"/> |
| I would be concerned that people would find out genetic or health information about me.                          | <input type="radio"/> | <input type="radio"/> | <input type="radio"/>      | <input type="radio"/> | <input type="radio"/> | <input type="radio"/> |
| I would only take up the offer of testing if I could exclude parts of the genome that I did not want to look at. | <input type="radio"/> | <input type="radio"/> | <input type="radio"/>      | <input type="radio"/> | <input type="radio"/> | <input type="radio"/> |

## PAPG Summer "Before" Questionnaire

### General views about whole genome sequencing

9. How useful do you think the results from whole genome sequencing will be to a physician?

- Not useful at all
- Not very useful
- Not sure
- Useful
- Very useful

10. How useful do you think the results from whole genome sequencing information will be to patients themselves?

- Not useful at all
- Not very useful
- Not sure
- Useful
- Very useful

11. How likely is it that knowing the results from whole genome sequencing for yourself would lead to any changes in your behavior?

- Not at all likely
- Not very likely
- Not sure
- Quite likely
- Very likely

12. Please respond to the following statements

|                                                                                                                                                                                     | Strongly disagree     | Disagree              | Neither agree nor disagree | Agree                 | Strongly agree        | Not applicable        |
|-------------------------------------------------------------------------------------------------------------------------------------------------------------------------------------|-----------------------|-----------------------|----------------------------|-----------------------|-----------------------|-----------------------|
| Whole genome sequencing is useful for patients.                                                                                                                                     | <input type="radio"/> | <input type="radio"/> | <input type="radio"/>      | <input type="radio"/> | <input type="radio"/> | <input type="radio"/> |
| If I underwent whole genome sequencing, I would ask a physician for help in interpreting the results.                                                                               | <input type="radio"/> | <input type="radio"/> | <input type="radio"/>      | <input type="radio"/> | <input type="radio"/> | <input type="radio"/> |
| Results of whole genome sequencing would influence my future health care decisions.                                                                                                 | <input type="radio"/> | <input type="radio"/> | <input type="radio"/>      | <input type="radio"/> | <input type="radio"/> | <input type="radio"/> |
| Physicians have a professional responsibility to help individuals understand the results they receive from whole genome sequencing, even if the physician has not ordered the test. | <input type="radio"/> | <input type="radio"/> | <input type="radio"/>      | <input type="radio"/> | <input type="radio"/> | <input type="radio"/> |
| Physicians have enough knowledge to help individuals interpret results of whole genome sequencing.                                                                                  | <input type="radio"/> | <input type="radio"/> | <input type="radio"/>      | <input type="radio"/> | <input type="radio"/> | <input type="radio"/> |
| Most people can accurately interpret whole genome sequencing results.                                                                                                               | <input type="radio"/> | <input type="radio"/> | <input type="radio"/>      | <input type="radio"/> | <input type="radio"/> | <input type="radio"/> |
| I know enough about genetics to understand the whole genome sequencing results.                                                                                                     | <input type="radio"/> | <input type="radio"/> | <input type="radio"/>      | <input type="radio"/> | <input type="radio"/> | <input type="radio"/> |
| I understand the risks and benefits of getting personal whole genome sequencing done.                                                                                               | <input type="radio"/> | <input type="radio"/> | <input type="radio"/>      | <input type="radio"/> | <input type="radio"/> | <input type="radio"/> |

## PAPG Summer "Before" Questionnaire

### Subjective understanding & self-efficacy

13. How would you describe your current understanding of genetics?

- None
- Minimal
- Some
- Moderate
- High

14. How would you rate your knowledge of genetics compared with others?

- Much less than others
- Less than others
- As much as others
- More than others
- Much more than others

15. How would you describe your current understanding of whole genome sequencing?

- None
- Minimal
- Some
- Moderate
- High

16. How would you rate your knowledge of whole genome sequencing compared with others?

- Much less than others
- Less than others
- As much as others
- More than others
- Much more than others



17. On a scale of 1-5, how confident are you in your ability to analyze and interpret whole genome sequence data?

- 1 No confidence
- 2
- 3 Moderate confidence
- 4
- 5 High confidence

## PAPG Summer "Before" Questionnaire

### Anxiety and depression

The questions on this page are designed to help us understand how you are feeling at the present time.

18. Please read the following statements which people have used to describe themselves. Please consider how you feel right now, that is, at this moment and respond with not at all, somewhat, moderately so, or very much so. There are no right or wrong answers. Do not spend too much time on any one statement but give the answer which seems to describe your present feelings best.

|                | Not at all            | Somewhat              | Moderately so         | Very much so          |
|----------------|-----------------------|-----------------------|-----------------------|-----------------------|
| I feel calm    | <input type="radio"/> | <input type="radio"/> | <input type="radio"/> | <input type="radio"/> |
| I am tense     | <input type="radio"/> | <input type="radio"/> | <input type="radio"/> | <input type="radio"/> |
| I feel upset   | <input type="radio"/> | <input type="radio"/> | <input type="radio"/> | <input type="radio"/> |
| I am relaxed   | <input type="radio"/> | <input type="radio"/> | <input type="radio"/> | <input type="radio"/> |
| I feel content | <input type="radio"/> | <input type="radio"/> | <input type="radio"/> | <input type="radio"/> |
| I am worried   | <input type="radio"/> | <input type="radio"/> | <input type="radio"/> | <input type="radio"/> |

19. Below is a list of a number of the ways you might have felt or behaved. Please check "Yes" or "No" if you have felt this way much of the time during the past week.

|                                             | Yes                   | No                    |
|---------------------------------------------|-----------------------|-----------------------|
| I felt depressed.                           | <input type="radio"/> | <input type="radio"/> |
| I felt that everything I did was an effort. | <input type="radio"/> | <input type="radio"/> |
| My sleep was restless.                      | <input type="radio"/> | <input type="radio"/> |
| I was happy.                                | <input type="radio"/> | <input type="radio"/> |
| I felt lonely.                              | <input type="radio"/> | <input type="radio"/> |
| People were unfriendly.                     | <input type="radio"/> | <input type="radio"/> |
| I enjoyed life.                             | <input type="radio"/> | <input type="radio"/> |
| I felt sad.                                 | <input type="radio"/> | <input type="radio"/> |
| I felt that people disliked me.             | <input type="radio"/> | <input type="radio"/> |
| I could not get "going."                    | <input type="radio"/> | <input type="radio"/> |

## PAPG Summer "Before" Questionnaire

### Knowledge about personal genomic information

**In this final section of the questionnaire, please read the following questions about genomics, and answer them as best you can. If you are not sure of an answer, don't worry, just check "I don't know".**

20. You have a 37-year-old patient who has a family history of breast and ovarian cancer (her mother with bilateral breast cancer at the age of 45 years, her maternal aunt with ovarian cancer at the age of 52 years, and her maternal grandmother with bilateral breast cancer at the age of 50 years). Because she did not want her insurance company to discriminate against her, she participated in a research study offering results from whole genome sequencing. She wants you to help her understand her testing results so that she can undergo any appropriate screening and/or prophylactic surgeries.

As epidemiologic background, 13% of the population develops breast cancer in their lifetime, and 5-10% of cases of breast cancer are estimated to be due to a genetic predisposition.

The study promised to report all discovered pathogenic mutations in the 56 ACMG Incidental Findings genes, which includes BRCA1 and BRCA2 (two of several genes associated with hereditary breast and ovarian cancer). The study did not report any pathogenic mutations to your patient.

How would you best interpret this case? Check all that apply:

- Patient is affected with breast cancer
- Patient has average risk
- Patient has higher risk than average
- Patient has lower risk than average
- Patient is a carrier of breast cancer and may develop it
- Patient has no risk for breast cancer
- A different genetic test should be ordered
- I don't know how to interpret this case

21. Fundamental limitations in 2nd generation (e.g. Illumina HiSeq 2000) whole exome sequencing technology are? Check all that apply:

- Low read depth
- The high background rate of neutral mutation
- De novo mutations
- Important genomic regions aren't targeted
- Important variant types can't be detected
- I don't know the limitations of whole exome sequencing technology

22. You discover the same novel (i.e. not previously observed in large studies like 1000 Genomes) autosomal coding deletion in a repetitive portion of the genome in multiple (of 100) unrelated individuals participating in a whole exome sequencing study of a complex adult-onset neurodegenerative phenotype. The most likely conclusions are? Check all that apply:

- The individuals are actually related
- The variant is an artifact of the sequencing and analysis workflow
- The variant is causal for the phenotype of interest
- I don't know how to make any conclusions

23. During the analysis of the data from a whole exome sequencing test ordered for an affected child and their unaffected parents (e.g. a trio), you identify a novel de-novo missense mutation predicted to be benign by SIFT and Polyphen2, two functional prediction algorithms. Check all that apply:

- You expect to observe a variant like this by chance
- You don't expect to observe a variant like this by chance
- This variant could not be the cause of this child's disease
- This variant could be the cause of this child's disease
- I don't know how to interpret this variant

24. You discover a rare (0.1% global minor allele frequency) homozygous protein-coding variant that has been previously reported to be pathogenic for an adult-onset autosomal dominant condition in a child undergoing whole exome sequencing for an unrelated condition. The parents are unaffected and not related but of the same ethnic background. What is the best way to interpret this result? Check all that apply:

- The patient is at higher risk than other carriers of this mutation
- The child may descend from a bottlenecked population in which this variant is a founder mutation
- The two conditions are actually related in some way
- The original reports may be confounded by cryptic population stratification
- I don't know how to interpret these results

25. Your patient has a grandparent with macular degeneration. He is concerned about the chance he may develop it. About 3% of the population develops macular degeneration, and you learn that about 66% of the risk for macular degeneration is due to a genetic predisposition. The studies from which these variants were derived had 300-3,000 cases and 1,000-5,000 controls. The reported odds ratios were 1.14-3.4 and risk allele frequencies in controls between 12-95% depending on the SNP and study.

You review their genetic testing results and find the following: LOC387715-S69A, +/-; CFH-intron, ++; CFB, ++; C2-E318D, ++; CFH-Y402H, +/-; and C3-R80G, ++.

Presume that - represents the low-risk allele and + represents the at-risk allele.

How would you best interpret this case? Check all that apply:

- Patient is affected with macular degeneration
- Patient has average risk
- Patient has higher risk than average
- Patient has lower risk than average
- Patient is a carrier of macular degeneration and may develop it
- Patient has no risk for macular degeneration
- A different genetic test should be ordered
- I don't know how to interpret this case

26. Assume that sequencing reads are equally likely to be drawn from the paternal and maternal chromosome, and further assume that a minimum of 3 reads are needed from each chromosome to accurately call a heterozygous genotype. How would you calculate the probability of having enough reads to correctly call a heterozygous genotype that has 10-fold coverage?

- One (1) minus the binomial cumulative distribution function with  $n=10$ ,  $p=0.5$ , and  $k=3$
- The Poisson probability with  $k=3$ ,  $\lambda=10$
- The sum of the binomial probability for  $k$  from 3 to 7 with  $n=10$ ,  $p=0.5$
- I don't know how to calculate this probability

27. You ask a colleague to run the whole genome data for a proband with an undiagnosed genetic disease through her ENSEMBL-based annotation pipeline and she reports a mutation that disrupts a splice-site acceptor that you did not detect in your RefSeq-based pipeline. What is the best the way to interpret these results? Check all that apply:

- Your colleague may have found the causal mutation
- RefSeq and ENSEMBL gene annotations are effectively the same so there is likely a bug in her pipeline
- The mutation your colleague found can't be in a clinically relevant gene of known function
- The mutation likely lies in a transcript present in ENSEMBL that is not present in RefSeq
- I don't know how to interpret these results

28. The pipeline reports the following two heterozygous protein-coding variants in MLH1 in the whole genome sequence of a healthy research subject. Both protein-coding mutations are reported to be pathogenic for hereditary colorectal cancer. How could you best interpret this situation given the supplied information? Check all that apply (codon translation not required):

p.Lys618Glu (c.1852A>G, chr3:g.37089130A>G)

p.Lys618Thr (c.1853A>C, chr3:g.37089131A>C)

- A. This individual could be compound heterozygous, i.e. the protein-coding mutations are on different chromosomes
- B. This individual could carry both the Glu and Thr mutations in cis, i.e. both occur on the same chromosome
- C. This individual could be heterozygous for p.Lys618Ala (c.1852\_1853delinsGC, chr3:g.37089130AA>GC)
- D. More than one of answers A-C (above) could be possible, and you will be unable to refine the interpretation using the NGS data
- E. More than one of answers A-C (above) could be possible, but all will ultimately have the same clinical interpretation
- F. I don't know how to interpret this data

29. Your 50-year old patient brings you a GWAS case-control study showing that their genotype is associated with a complex disease with an odds-ratio (OR) of 2.5. The disease has a prevalence of 25% and can arise from age 10 onwards. They are concerned that they have a 62.5% chance of developing the disease in the future. Which of the following is an accurate way to communicate your patient's risk to them given the available information? Check all that apply:

- You are actually underestimating your risk! Relative risk is usually larger than the odds-ratio.
- You are correct; you have a 62.5% chance of developing the disease in the future.
- You are correct; you are at 2.5-fold higher risk for the disease than the general population.
- You are overestimating your relative risk; your absolute risk to develop the disease will be above 25% but below 62.5%.
- You are overestimating both your relative risk and "pre-test" risk; we would estimate your absolute risk to develop the disease to be below 62.5% and may be below 25%.
- I don't know how to communicate their risk.

## PAPG Summer "Before" Questionnaire

### Comments

30. Finally, we are very interested in any additional thoughts or comments you might have regarding the possibility of analyzing personal genomes in an advanced whole genome sequencing course. Please write any suggestions, comments, concerns, thoughts or questions in the box below.

*Thank you very much for taking the time to complete this questionnaire!*
